# Supplementary material
Source: PubMed Central journal article supplement (PMC7728544)

Figure S1

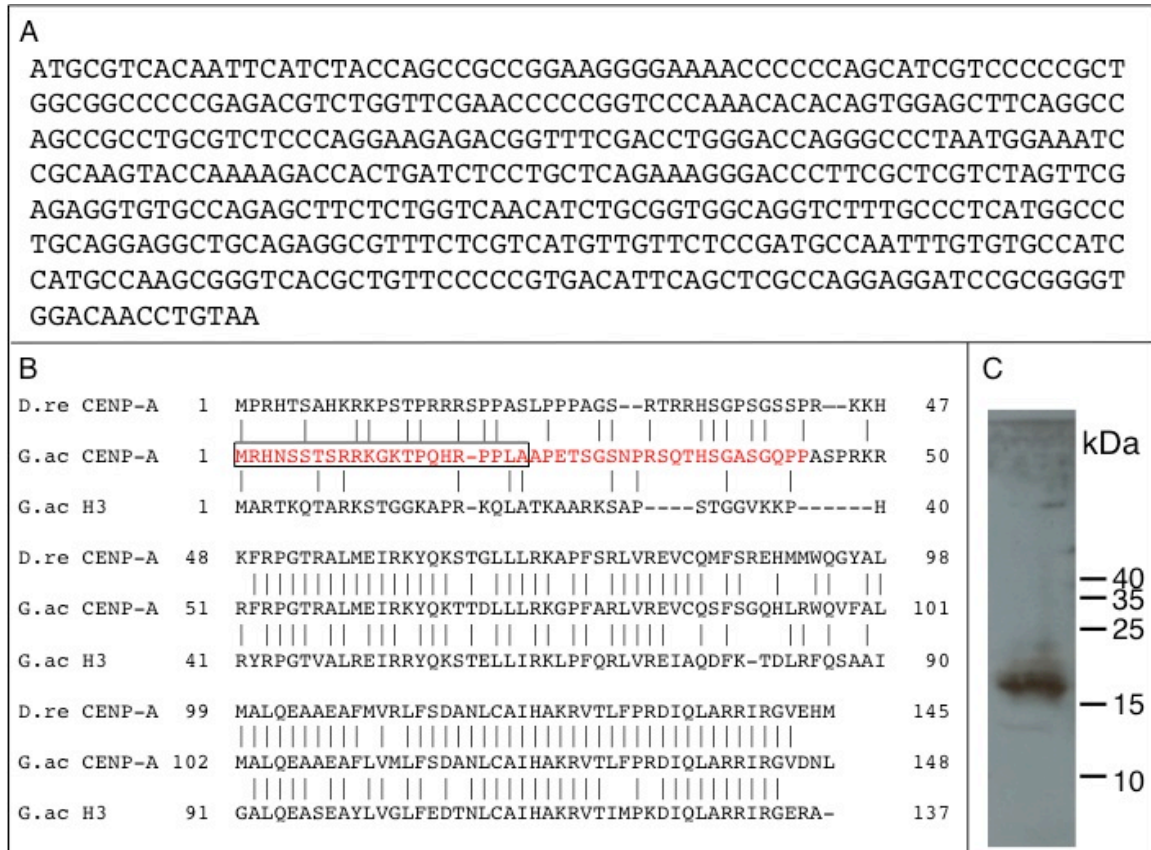

Figure S2

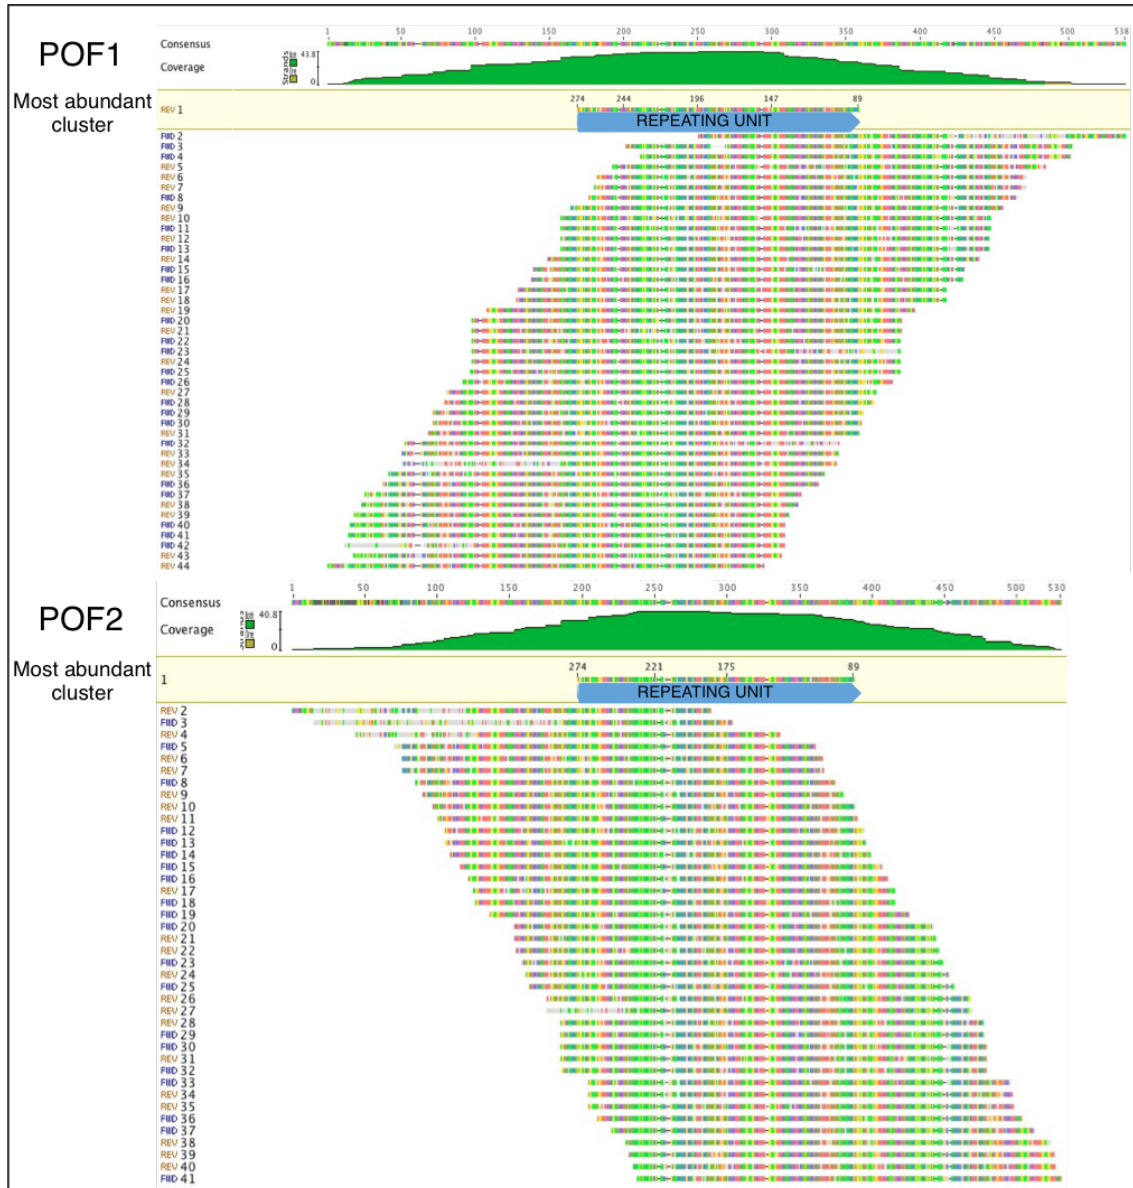

Figure S3

|      |     |                                                                    |     |
|------|-----|--------------------------------------------------------------------|-----|
| POF1 | 1   | GAGGTGCTAGTTTTAGGAAAACACTGTTAACCAATGCATTCTTGTGTTCTGTGCGTTTTTCAGCTT | 65  |
|      |     |                                                                    |     |
| POF2 | 1   | GAGGTGCTAGTTTTAGGAAAACACTGTTAACCAATGCATTCTTGTGTTCTGTGCGTTTTTCAGCTT | 65  |
|      |     |                                                                    |     |
| POF1 | 66  | TCTCTCGGCCTGCAAACGCCTTAATAGTCAAGAATGCACCAAACCTTAGTTTGAACAAAAAGGT   | 130 |
|      |     |                                                                    |     |
| POF2 | 66  | TCTCTCGGCCTGCAAACGCCTTAATAGTCAAGAANGCACCAAACCTTAGTTTGAACAAAAAGGT   | 130 |
|      |     |                                                                    |     |
| POF1 | 131 | TGGAAAACATTCACAAACCATGATACCATCATAAACAGATAAATGTACTTTCCT             | 186 |
|      |     |                                                                    |     |
| POF2 | 131 | TGGAAAACATTCACAAACCATGATACCATCATRAAACAGATAAATGTACTTTCCT            | 186 |
|      |     |                                                                    |     |

Fig S4

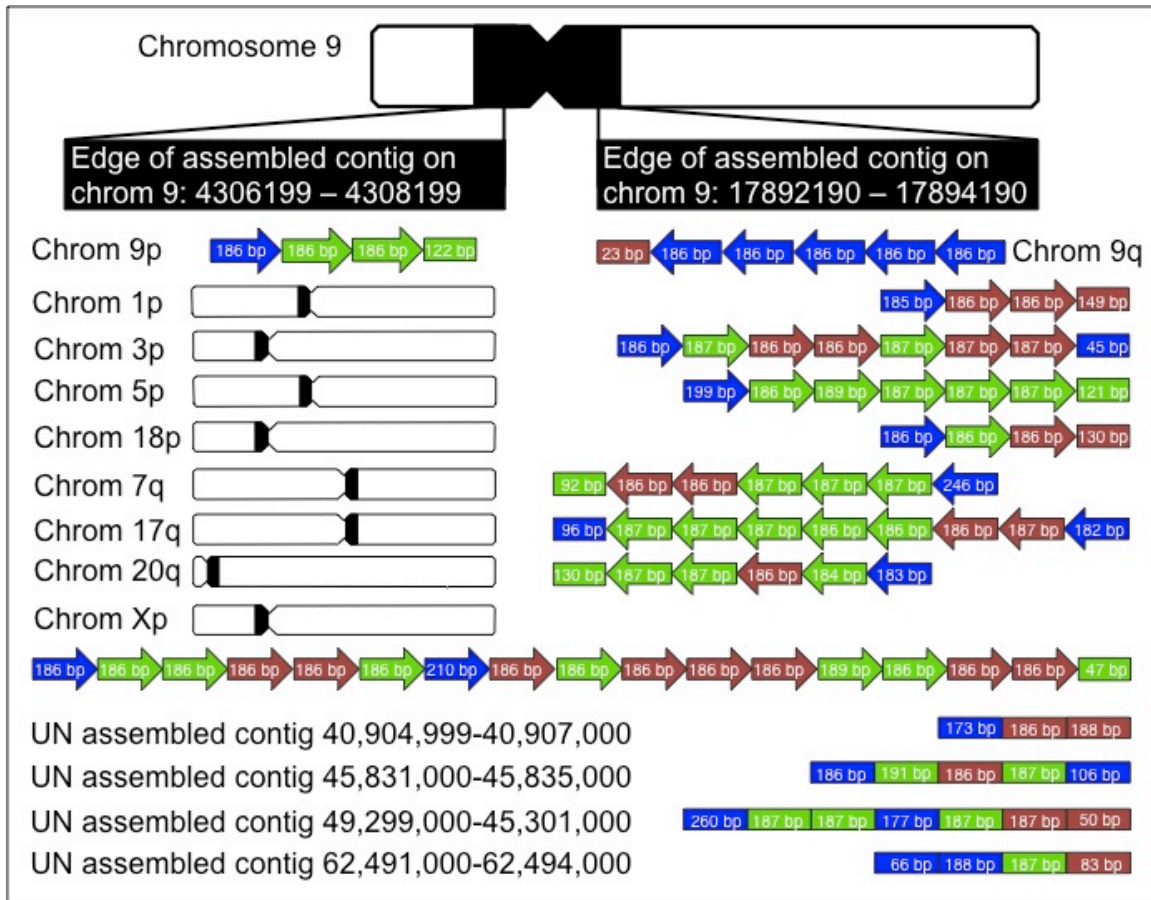

Supplement: NIHMS1650517-supplement-Cech_and_Peichel_supplementary_figures.pdf [file NIHMS1650517-supplement-Cech_and_Peichel_supplementary_figures.pdf]
